# Supplementary material for: Leveraging a Fluorescent Fatty Acid Probe to Discover Cell-Permeable Inhibitors of Plasmodium falciparum Glycerolipid Biosynthesis
Source: PubMed Central journal article supplement (PMC9769509; doi:10.1128/spectrum.02456-22), 2022-10-31
Supplement: spectrum.02456-22-s0001.pdf [file spectrum.02456-22-s0001.pdf]

**Supplemental Figure S1:** Structures of fluorescent probes used in this study.

**BODIPY-C4,C9**

Tradename: BODIPY™ 500/510 C<sub>4</sub>, C<sub>9</sub>

Chemical name: 5-butyl-4,4-difluoro-4-bora-3a,4a-diaza-s-Indacene-3-nonanoic acid

Source: ThermoFisher B3824

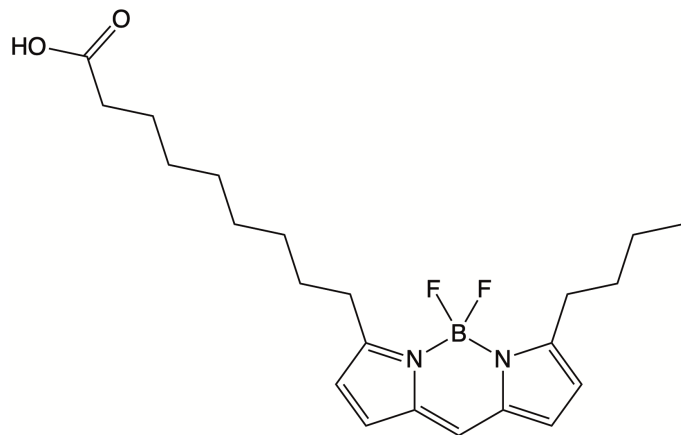

**BODIPY-C1,C12**

Tradename: BODIPY™ 500/510 C<sub>1</sub>, C<sub>12</sub>

Chemical name: 4,4-difluoro-5-methyl-4-bora-3a,4a-diaza-s-indacene-3-dodecanoic acid

Source: ThermoFisher D3823

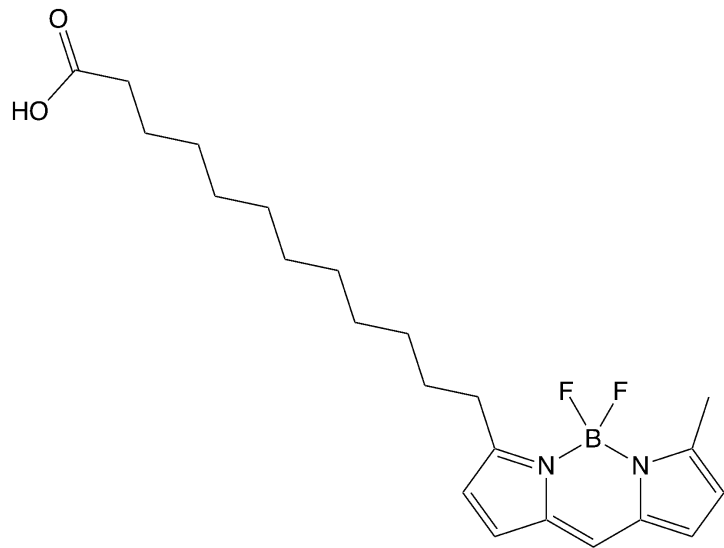



### TOPFLUOR-C11

Chemical name: 11-(dipyrrometheneboron difluoride)undecanoic acid

Source: Avanti Polar Lipids

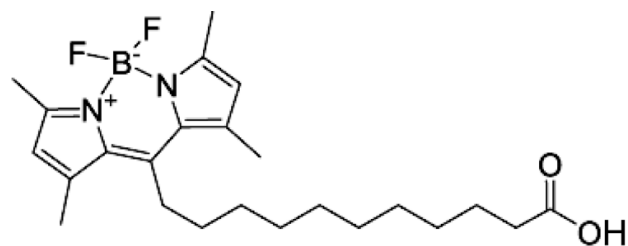

### BODIPY-TR-CERAMIDE

Source: ThermoFisher D7540

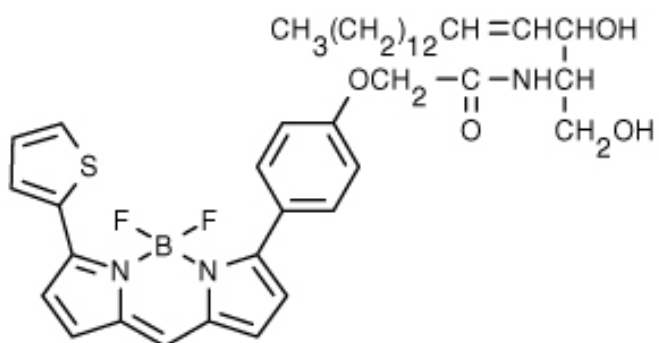

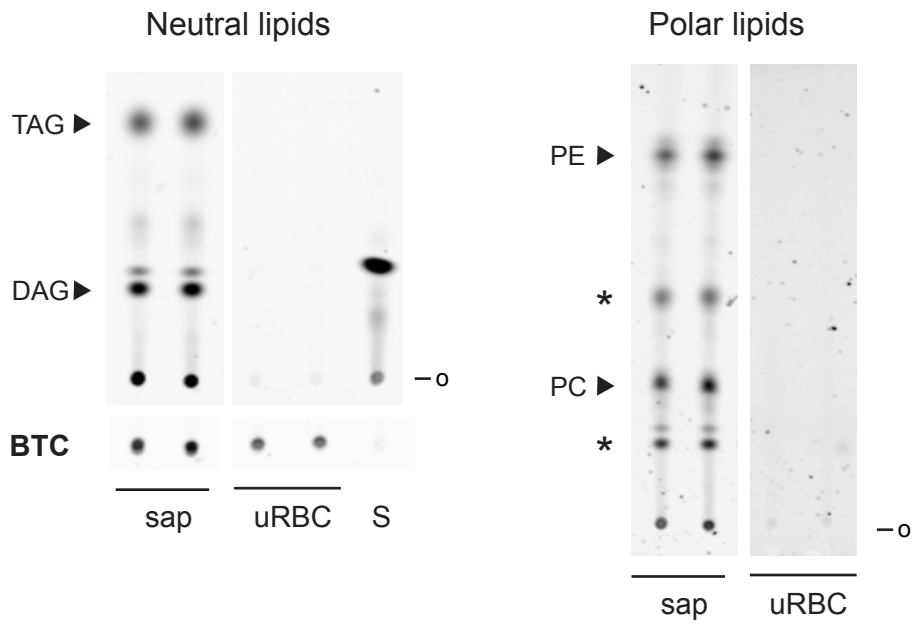

**Supplemental Figure S2:** Comparison of C4,C9-FA uptake by equal numbers of saponin-isolated parasites ("sap") and uninfected erythrocytes ("uRBC"), each labeled and extracted in duplicate. S, C4,C9-FA standard. Asterisks indicate residual neutral lipids (DAG and TAG) in the polar lipid image. o, origin.

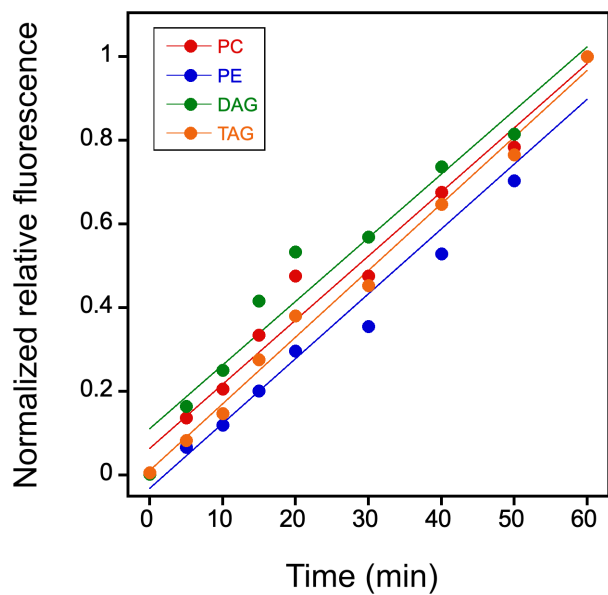

**Supplemental Figure S3:** BTC-normalized fluorescence intensities over time for the major lipid species in Fig. 1B, expressed as a fraction relative to the values at 60 minutes. Lines are linear regression fits.

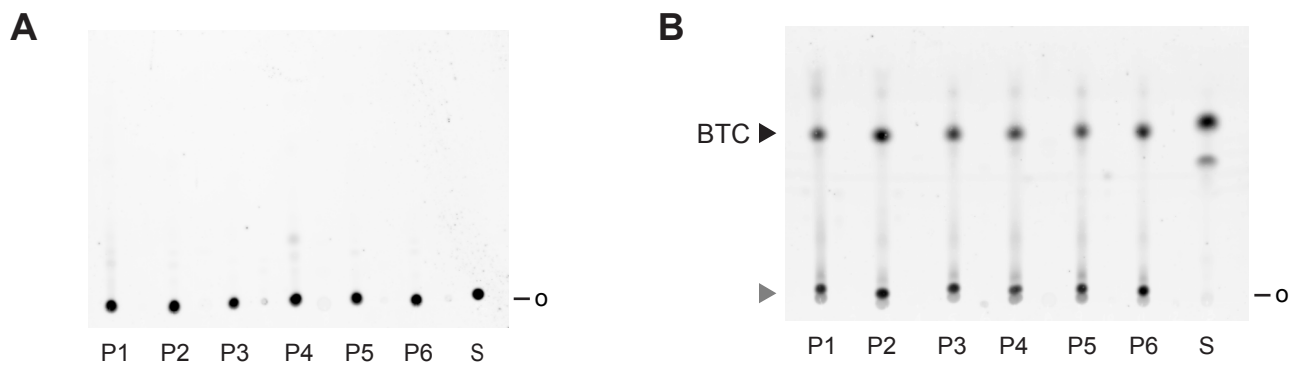

**Supplemental Figure S4:** Migration of BTC after TLC development of (A) neutral lipids and (B) polar lipids. P1-P6 are parasite lipid extracts and S is a BTC standard. o, origin. In (B), BTC is indicated with a black arrowhead and a polar metabolite (probably sphingomyelin) with a gray arrowhead. The TLC images correspond to those shown in Fig. 1A.

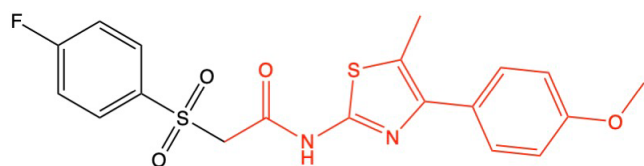

MMV665915

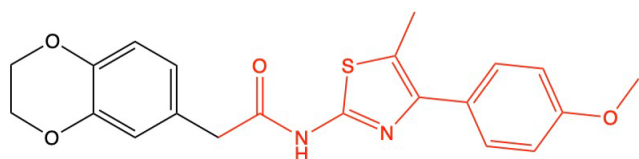

MMV019719

**Supplemental Figure S5:** Structures of the Malaria Box compound MMV665915, identified as an inhibitor of neutral lipid synthesis in this study, and the compound MMV019719 that was found to induce mutations in ACS11 in the resistance selection study of Cowell *et al* (2018). Structural features common to both are shown in red.

**Supplemental Table S1:** Inhibition of C4,C9-FA labeling of neutral- and phospho-lipids by FAAH and MAGL inhibitors (10  $\mu$ M concentration). Values are BTC-normalized and are reported as a percentage of no-inhibitor control. Where three independent assays were conducted, values are reported as means  $\pm$  standard deviation. For compounds with fewer than three replicates, individual values are provided. Compounds indicated in bold font exhibit  $\geq 95\%$  inhibition of at least one lipid species. SH, serine hydrolase; MAGL, monoacylglycerol lipase; FAAH, fatty acid amide hydrolase. CID, compound ID.

| Inhibitor              | Pubchem CID     | Source               | Mechanism           | DAG                           | TAG                           | PC                              | PE                           |
|------------------------|-----------------|----------------------|---------------------|-------------------------------|-------------------------------|---------------------------------|------------------------------|
| <i>MAGL inhibitors</i> |                 |                      |                     |                               |                               |                                 |                              |
| <b>AKU-002</b>         | <b>none</b>     | <b>T. Nevalainen</b> | <b>covalent SH</b>  | <b>51 <math>\pm</math> 15</b> | <b>83 <math>\pm</math> 19</b> | <b>1.6 <math>\pm</math> 1.1</b> | <b>28 <math>\pm</math> 7</b> |
| AKU-005                | none            | T. Nevalainen        | covalent SH         | 106, 75                       | 136, 80                       | 40, 37                          | 76, 58                       |
| AKU-006                | none            | T. Nevalainen        | covalent SH         | 59, 40                        | 62, 43                        | 25, 36                          | 46, 35                       |
| AKU-010                | none            | T. Nevalainen        | covalent SH         | 90, 73                        | 109, 82                       | 65, 70                          | 83, 71                       |
| JJKK-006               | none            | T. Nevalainen        | covalent SH         | 60                            | 74                            | 10                              | 38                           |
| JJKK-033               | none            | T. Nevalainen        | covalent SH         | 88, 61                        | 91, 61                        | 43,38                           | 63, 48                       |
| JJKK-046               | none            | T. Nevalainen        | covalent SH         | 64                            | 76                            | 87                              | 63                           |
| JJKK-048               | none            | T. Nevalainen        | covalent SH         | 86, 61                        | 95, 74                        | 72, 53                          | 65, 55                       |
| <i>FAAH inhibitors</i> |                 |                      |                     |                               |                               |                                 |                              |
| PF-3845                | 25154867        | Cayman               | covalent SH         | 6, 5                          | 7, 7                          | 57, 51                          | 32, 25                       |
| <b>PF-04457845</b>     | <b>24771824</b> | <b>Cayman</b>        | <b>covalent SH</b>  | <b>3 <math>\pm</math> 1</b>   | <b>5 <math>\pm</math> 4</b>   | <b>50 <math>\pm</math> 14</b>   | <b>23 <math>\pm</math> 9</b> |
| PF-622                 | 11515763        | Cayman               | covalent SH         | 104, 91                       | 113, 87                       | 106, 101                        | 113, 109                     |
| PF-750                 | 25154868        | Cayman               | covalent SH         | 80                            | 89                            | 97                              | 95                           |
| JP83                   | 35027739        | Cayman               | covalent SH         | 17, 14                        | 18, 18                        | 53, 63                          | 31, 32                       |
| JP104                  | 24860363        | Cayman               | covalent SH         | 8                             | 9                             | 52                              | 26                           |
| SA57                   | 44589122        | Cayman               | covalent SH         | 67, 55                        | 75, 60                        | 89, 102                         | 80, 81                       |
| URB597                 | 1383884         | Cayman               | covalent SH         | 16, 4                         | 21, 6                         | 82, 35                          | 51, 22                       |
| <b>arachidonyl-TFK</b> | <b>5280436</b>  | <b>Cayman</b>        | <b>non-covalent</b> | <b>1 <math>\pm</math> 1</b>   | <b>1 <math>\pm</math> 1</b>   | <b>59 <math>\pm</math> 9</b>    | <b>24 <math>\pm</math> 5</b> |



**Supplemental Table S2:** Compound pools created to screen Plate A of the Malaria Box collection.

| <b>Pool</b> | <b>Compounds (MMV-)</b>              |
|-------------|--------------------------------------|
| 1           | 019066<br>006427<br>006203<br>666101 |
| 2           | 011099<br>007116<br>007839           |
| 3           | 665941<br>666062<br>665977<br>666596 |
| 4           | 000642<br>009063<br>007384<br>000662 |
| 5           | 020885<br>020549<br>396679           |
| 6           | 666600<br>006558<br>020548<br>396678 |
| 7           | 000570<br>001246<br>396797           |
| 8           | 006172<br>007160<br>019258<br>006861 |
| 9           | 008294<br>020439<br>008138           |
| 10          | 006309<br>006429<br>007686<br>006457 |

| <b>Pool</b> | <b>Compounds (MMV-)</b>              |
|-------------|--------------------------------------|
| 11          | 011259<br>396672<br>665915<br>665916 |
| 12          | 006087<br>396703<br>011256<br>396693 |
| 13          | 019406<br>019871<br>020788           |
| 14          | 020492<br>006937<br>666693           |
| 15          | 006278<br>085583<br>000448<br>666691 |
| 16          | 006455<br>008956<br>007907           |
| 17          | 008416<br>020500<br>665785           |
| 18          | 665782<br>665820<br>665827<br>665805 |
| 19          | 019110<br>665874<br>665878<br>665831 |
| 20          | 665876<br>001038<br>666021           |
